# Supplementary material for: Epinephrine Stimulates Mycobacterium tuberculosis Growth and Biofilm Formation
Source: MDPI journal article supplement (doi:10.3390/ijms242417370), 2023-12-12
Supplement: s1 [file s1]

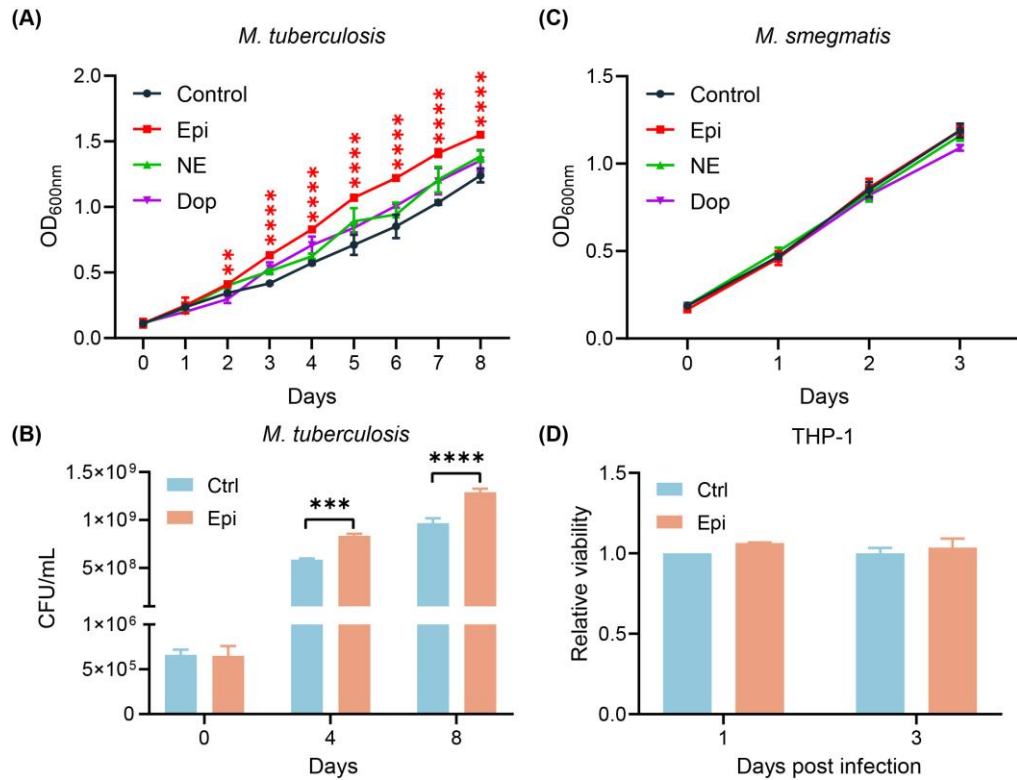

**Figure S1.** Effects of catecholamine stress hormones on *M. tuberculosis* and *M. smegmatis*. (A) Effects of catecholamine stress hormones (2  $\mu$ M Epi, 2  $\mu$ M NE, and 2  $\mu$ M Dop) on the growth of *M. smegmatis* on serum-7H9 medium. (B) Effects of Epi on *M. tuberculosis* CFU *in vitro*. (C) Effects of catecholamine stress hormones (2  $\mu$ M Epi, 2  $\mu$ M NE, and 2  $\mu$ M Dop) on the growth of *M. smegmatis* on serum-7H9 medium. (D) THP-1 cell viability was assessed by MTS assay. \*\*\*\*,  $p < 0.0001$ ; \*\*\*,  $p < 0.001$ ; \*\*,  $p < 0.01$  (two-way ANOVA). Data are representative of three independent experiments with three biological replicates (mean  $\pm$  SEM).

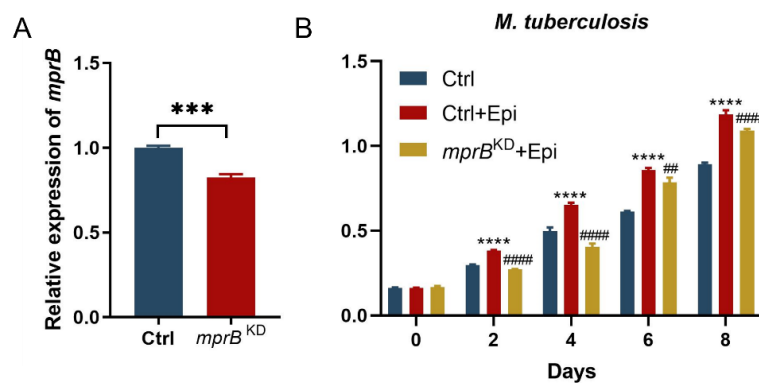

**Figure S2.** MprB is involved in regulation of *M. tuberculosis* growth *in vitro* by Epi. (A) Confirmation of *mprB* knocked down in *M. tuberculosis* by qRT-PCR. The data are represented as mean  $\pm$  SEM. Statistical significance was determined using Student's *t* test. \*\*\*,  $p < 0.001$ . (B) Effects of Epi on *mprB* knocked down *M. tuberculosis* strain as compared to the wild-type strain. \*\*\*\* and ####,  $p < 0.0001$ ; #,  $p < 0.01$  (two-way ANOVA). Data are representative of three independent experiments with three biological replicates (mean  $\pm$  SD).
