# Supplementary material for: Epinephrine Stimulates Mycobacterium tuberculosis Growth and Biofilm Formation
Source: Int J Mol Sci. 2023 Dec 12;24(24):17370. doi: 10.3390/ijms242417370 (PMC10743465; doi:10.3390/ijms242417370)
Supplement: Supplementary file 1 [file ijms-24-17370-s001.zip › ijms-2696494-supplementary table.xlsx]

## Sheet: Sheet1
Anova (p)	q Value	Max Fold Change	Ctrl1	Ctrl2	Ctrl3	Epi1	Epi2	Epi3	Accepted Compound ID	Accepted Description	Formula
0.00947886	0.0248546	1.43509	369143	333543	407768	482285	575389	535932	HMDB0011649	1-(sn-Glycero-3-phospho)-1D-myo-inositol	C9H19O11P
1.26e-05	8.63e-05	3.69341	5445.94	5368.31	5236.17	18419.1	19211.9	21649.8	HMDB00379	2-Methylcitric acid	C7H10O7
7.92e-05	0.000459587	Infinity	0	0	0	9351.15	1751.3	9629.19	71205(C16463)	3',5'-Cyclic diGMP	C20H24N10O14P2
0.223842	0.305639	1.46277	285790	283258	452531	138638	259086	300662	HMDB0001173	5'-Methylthioadenosine	C11H15N5O3S
0.729247	0.60691	1.04489	2485.73	1950.07	1933.08	2358.91	1742.72	1993.64	HMDB0001107	7-Methylguanosine	C11H16N5O5+
0.288829	0.329414	1.06512	8377.14	8868.37	8966.74	8529.68	9415.83	9973.81	HMDB00034	Adenine	C5H5N5
0.0365987	0.077897	1.10394	24070.4	23318.2	21629.9	25575.3	25538.7	25078.5	HMDB00050	Adenosine	C10H13N5O4
0.332863	0.401593	1.35364	892313	1.7272e+06	988093	1.91532e+06	1.06356e+06	1.90454e+06	HMDB00045	Adenosine monophosphate	C10H14N5O7P
0.319596	0.353862	1.07501	112385	131592	136523	129398	142700	136944	HMDB01341	ADP	C10H15N5O10P2
0.0251411	0.0537129	3.49231	1600.43	2337.43	3645.16	5834.08	13740.6	6907.62	HMDB0001517	AICAR	C9H15N4O8P
0.000395053	0.00172187	1.33645	7299.51	7001.76	6943.46	9077.26	9558.57	9756.78	HMDB00030	Biotin	C10H16N2O3S
0.000686911	0.00273124	6.8318	1747.7	954.327	1204.36	7150.4	9731.55	9805.74	HMDB01546	CDP	C9H15N3O11P2
0.0011328	0.00419104	2.23579	44193.4	56496.8	54215.6	23519.1	25181.5	20584.1	HMDB00904	Citrulline	C6H13N3O3
0.876835	0.652573	1.02047	1212.45	2048.57	2026.04	1012.89	1824.19	2343.93	HMDB0001423	Coenzyme A	C21H36N7O16P3S
0.473089	0.488483	1.0552	88416.1	84278.8	91248.9	86827.6	104220	87465.3	HMDB00064	Creatine	C4H9N3O2
9.05e-10	4.74e-08	Infinity	0	0	0	21554.2	21285.3	23958	HMDB01314	Cyclic GMP	C10H12N5O7P
5.59e-08	8.39e-07	Infinity	0	0	0	4672.25	6406.08	5371.81	HMDB0060465	cyclic GMP-AMP	C20H24N10O13P2
0.0662869	0.123658	3.36024	12967.2	42183	18225	103585	37027.8	105945	HMDB0000905	Deoxyadenosine monophosphate	C10H14N5O6P
0.0350499	0.0751353	1.65735	1895.28	2343.82	1433.85	1185.42	1235.96	1001.53	HMDB00014	Deoxycytidine	C9H13N3O4
0.00146516	0.00514462	1.26545	6366.39	6780.73	6916.4	5112.46	5408.74	5333.62	HMDB00012	Deoxyuridine	C9H12N2O5
0.746595	0.595269	1.18311	13966.5	14405	18278.5	9673.25	22480	23038.9	HMDB0001373	Dephospho-CoA	C21H35N7O13P2S
0.014364	0.0343398	1.4074	24966.2	26303.1	27614.8	15894	20445.6	19710.1	HMDB0001321	D-Erythrose 4-phosphate	C4H9O7P
0.482877	0.458367	1.03839	457697	453965	478755	441806	490175	511814	HMDB01068	D-Sedoheptulose 7-phosphate	C7H15O10P
1.22e-05	8.43e-05	29.8147	364.603	326.223	267.407	10452.3	7879.36	10237.7	HMDB0001409	dUMP	C9H13N2O8P
0.0106583	0.027081	2.00268	3222.15	4715.36	5115.56	8954.87	7643.96	9542.28	HMDB0001265	Fucose 1-phosphate	C6H13O8P
1.66e-05	0.000109724	3.85428	1325.75	1262.01	1333.85	4984.65	4609.66	5520.72	HMDB00134	Fumaric acid	C4H4O4
0.0254893	0.0542657	1.695	82896.8	93001	63821.8	45653.2	39508.9	56265.7	HMDB11738	Gamma-Glutamylglutamine	C10H17N3O6
0.528994	0.481937	1.02565	1.77356e+06	1.71582e+06	1.71515e+06	1.75877e+06	1.68707e+06	1.89217e+06	HMDB00126	Glycerol 3-phosphate	C3H9O6P
1.44e-06	1.6e-05	3.41963	728.946	782.382	766.956	2633.47	2508.44	2648.97	HMDB00123	Glycine	C2H5NO2
0.00296388	0.00942532	1.60574	102839	91867.1	91793	162229	134825	162991	HMDB01397	Guanosine monophosphate	C10H14N5O8P
0.00153552	0.00551343	4.60971	2937.56	4583.37	3116.37	17189.1	12208	19637.7	HMDB00157	Hypoxanthine	C5H4N4O
0.96612	0.686108	1.00151	3625.01	4083.8	3800.46	4207.15	3682.13	3602.57	HMDB0001525	Imidazole	C3H4N2
0.0334353	0.0724156	1.66237	49041.5	63850.5	48719.5	100948	68024.6	99684.7	HMDB00517	L-Arginine	C6H14N4O2
0.00726585	0.0198944	1.97868	85894.5	63553.3	59513	35166.1	30878.3	39561.7	HMDB00641	L-Glutamine	C5H10N2O3
3.64e-06	2.86e-05	3.07532	2258.67	2347.48	2491.04	7242.12	7457.27	7126.75	HMDB00177	L-Histidine	C6H9N3O2
7.08e-06	6.1e-05	8.5856	2299.71	1915.42	2402.58	19355.4	18370.2	19091.5	HMDB00696	L-Methionine	C5H11NO2S
0.227811	0.277185	1.06474	6338.82	6808.69	6293.48	6674.63	6625.38	7399.51	HMDB00159	L-Phenylalanine	C9H11NO2
7.5e-05	0.000440814	2.78715	168938	141254	150331	425245	452809	405495	HMDB00162	L-Proline	C5H9NO2
6.19e-05	0.000347144	1.18855	4384.28	4344.86	4281.31	3630.92	3699.3	3616.23	HMDB00158	L-Tyrosine	C9H11NO3
0.879322	0.652956	1.01006	545355	524645	472651	528135	424750	574405	69077(C11052)	Mycothione	C34H58N4O24S2
0.500117	0.501951	1.01512	45772.6	37272	44928	12458.3	100285	13322.8	HMDB04620	N-a-Acetyl-L-arginine	C8H16N4O3
0.0567851	0.101576	1.16408	11257.5	11624.5	10398.9	8662.7	9831.64	10095.5	HMDB00230	N-Acetylneuraminic acid	C11H19NO9
1.7e-05	0.000130332	57.2507	7338.76	10012.7	5877.59	434972	398267	496642	HMDB0012267	N-Succinyl-L,L-2,6-diaminopimelate	C11H18N2O7
4.1e-05	0.000241135	2.20702	630306	641572	624392	1.28675e+06	1.45848e+06	1.43987e+06	HMDB00208	Oxoglutaric acid	C5H6O5
0.829089	0.645366	1.00981	2918.13	3284.62	3047.98	3281.28	3070.01	2990.19	HMDB03229	Palmitoleic acid	C16H30O2
2.67e-06	2.18e-05	2.38176	12235	11658	12415.3	28299.4	28703.8	29474.5	HMDB00210	Pantothenic acid	C9H17NO5
0.000229277	0.0010672	5.27908	913.057	1328.23	970.652	5013.33	5670.17	6272.59	HMDB00263	Phosphoenolpyruvic acid	C3H5O6P
0.000136718	0.00069244	3.30333	19209.7	16418.5	16530.1	57464.2	50941	63891	HMDB00243	Pyruvic acid	C3H4O3
1.13e-07	1.41e-06	5.99563	14270.5	13443.9	14217.1	82439.4	84294.6	84671.9	HMDB00939	S-Adenosylhomocysteine	C14H20N6O5S
3.68e-11	9.21e-09	Infinity	0	0	0	580801	591082	624826	63671(R05629)	UDPMurAc(oyl-L-Ala-D-gamma-Glu-L-Lys-D-Ala-D-Ala)	C40H65N9O26P2
6.58e-06	4.84e-05	7.59522	38554.1	38829.1	37029.7	255873	318232	294885	HMDB0011720	UDP-N-acetylmuraminate	C20H31N3O19P2
0.000839348	0.00326043	45271.2	36.5844	13.2226	0	646480	767197	841149	63457(C00692)	UDP-N-acetylmuramoyl-L-alanyl-D-glutamate	C28H43N5O23P2
0.00115942	0.00426872	15.625	494.098	1275.7	1410.62	14427.2	16438.6	18828.2	63449 (C04882)	UDP-N-acetylmuramoyl-L-alanyl-D-glutamyl-6-carboxy-L-lysyl-D-alanyl-D-alanine	C41H65N9O28P2
5.13e-09	1.46e-07	Infinity	0	0	0	13107.7	10925.5	12510.9	63672(C05892)	UDP-N-acetylmuramoyl-L-alanyl-gamma-D-glutamyl-L-lysine	C34H55N7O24P2
0.000277831	0.00126748	2.50606	601.582	674.645	664.99	1501.06	1846.55	1517.19	HMDB00300	Uracil	C4H4N2O2
0.00184829	0.00643157	1.46023	152334	153755	140385	110867	97525.6	97362.9	HMDB00295	Uridine 5'-diphosphate	C9H14N2O12P2
1.43e-05	9.59e-05	4.09067	116262	134818	136315	506437	543012	535260	HMDB00288	Uridine 5'-monophosphate	C9H13N2O9P
2.68e-05	0.000168281	1.70484	867990	852907	862443	497319	529189	488790	HMDB00286	Uridine diphosphate glucose	C15H24N2O17P2
0.000215252	0.0010078	3.66442	3254.58	3906.03	3811.88	11295.7	14841.8	14070.3	HMDB00299	Xanthosine	C10H12N4O6
